# Supplementary material for: Faecal biomarkers can distinguish specific mammalian species in modern and past environments
Source: PLoS One. 2019 Feb 7;14(2):e0211119. doi: 10.1371/journal.pone.0211119 (PMC6366745; doi:10.1371/journal.pone.0211119)
Supplement: S1 Table — 5β-stanols considered in this study and common 5α-stanols and sterols found in samples analyzed. Chromatographic and mass-spectrometric properties for identification and quantification of listed compounds are also presented. (XLSX) [file pone.0211119.s003.xlsx]

## Sheet: Table S1 Compounds
Trivial name	IUPAC name	Class	Sterol precursor	RT* (min)	RTT* (cholesterol)	m/z fragments (as TMSi ethers)
						M+	Identification	Quantification (SIM mode)	Quantification Standard (SIM mode)
Coprostanol	5β-Cholestan-3β-ol	5β-stanol	Cholesterol	44.16	0.923	460	257, 355, 370	215	Coprostanol (m/z 215)
Epicholestanol	5α-cholestan-3α-ol	5α-stanol	Cholesterol	44.85	0.937	460	257, 355, 370	215	Cholestanol (m/z 215)
Epicoprostanol	5β-Cholestan-3α-ol	5β-stanol	Cholesterol	44.87	0.938	460	257, 355, 370	215	Epicoprostanol (m/z 215)
5β-Brassicastanol†	24-Methyl-5β-cholest-22E-en-3β-ol	5β-stanol	Brassicasterol	45.86	0.959	472	215, 257, 382	215	Coprostanol (m/z 215)
5β-Lichestanol†	24-Methyl-5β-cholesta-8(9),22E-dien-3β-ol	5β-stanol	Lichesterol	46.16	0.965	470	213, 229, 255, 343	253	Ergosterol (m/z 253)
5β-Epibrassicastanol†	24-Methyl-5β-cholest-22E-en-3α-ol	5β-stanol	Brassicasterol	46.69	0.976	472	215, 257, 382	215	Epicoprostanol (m/z 215)
Cholesterol	Cholest-5-en-3β-ol	Sterol		47.82	1.000	458	255,353, 368	129	Cholesterol (m/z 129)
Cholestanol	5α-Cholestan-3β-ol	5α-stanol	Cholesterol	48.37	1.011	460	215, 257, 355, 445	445	Cholestanol (m/z 445)
5β-Campestanol	24-Methyl-5β-cholestan-3β-ol	5β-stanol	Campesterol	48.4	1.012	474	215, 257, 369, 384	384‡	Coprostanol (m/z 370‡)
5α-Epicampestanol	24-Methyl-5α-cholestan-3α-ol	5α-stanol	Campesterol	49.04	1.025	474	215, 257, 369, 384	215	Cholestanol (m/z 215)
5β-Epicampestanol	24-Methyl-5β-cholestan-3α-ol	5β-stanol	Campesterol	49.17	1.028	474	215, 257, 369, 384	215	Epicoprostanol (m/z 215)
5β-Stigmastanol	24-Ethyl-5β-cholesta-22E-en-3β-ol	5β-stanol	Stigmasterol	49.51	1.035	486	257, 353, 486	215 or 486‡	24-Ethylcoprostanol (m/z 215 or 488‡)
Brassicasterol	24-Methyl-cholesta-5,22E-dien-3β-ol	Sterol		49.55	1.036	470	213, 253, 341, 381	129	Stigmasterol (m/z 129)
Lichesterol	24-Methyl-cholesta-5,8,22E-trien-3β-ol	Sterol		49.9	1.043	468	211, 253, 337, 363	363	Ergosterol (m/z 363)
5β-Epistigmastanol	24-Ethyl-5β-cholesta-22E-en-3α-ol	5β-stanol	Stigmasterol	50.21	1.049	486	257, 486	215 or 486‡	24-Ethylepicoprostanol (m/z 215 or 488†)
Ergosterol	24-Methyl-cholesta-5,7,22E-trien-3β-ol	Sterol		51.00	1.066	468	211, 253, 337, 363	363	Ergosterol (m/z 363)
24-Ethylcoprostanol	24-Ethyl-5β-cholestan-3β-ol	5β-stanol	Sitosterol	51.47	1.076	488	257, 383, 398	215 or 398‡	24-Ethylcoprostanol (m/z 215 or 398‡)
5α-Ergostanol or Stellasterol	24-Methyl-5α-cholesta-7,22E-dien-3β-ol	5α-stanol	Ergosterol	51.67	1.08	470	213, 229, 255, 343	253	Ergosterol (m/z 253)
Campesterol	24-Methyl-cholest-5-en-3β-ol	Sterol		51.69	1.08	472	255, 353, 382	129	Cholesterol (m/z 129)
24-Ethylepicoprostanol	24-Ethyl-5β-cholestan-3α-ol	5β-stanol	Sitosterol	51.98	1.086	488	215, 257, 283, 398	215 or 398‡	24-Ethylepicoprostanol (m/z 215 or 398‡)
Campestanol	24-Methyl-5α-cholestan-3β-ol	5α-stanol	Campesterol	52.14	1.09	474	369, 398, 484	215	Cholestanol (m/z 215)
Stigmasterol	24-Ethyl-cholesta-5,22E-dien-3β-ol	Sterol		52.5	1.097	484	255, 355, 394,	129	Stigmasterol (m/z 129)
Stigmastanol	24-Ethyl-5α-cholesta-22E-dien-3β-ol	5α-stanol	Sitgmasterol	52.96	1.107	486	215, 383	215	Sitostanol (m/z 215)
Sitosterol	24-Ethyl-cholest-5-en-3β-ol	Sterol		54.6	1.141	486	255, 357, 396	129	Sitosterol (m/z 129)
Sitostanol	24-Ethyl-5α-cholestan-3β-ol	5α-stanol	Sitosterol	55.11	1.152	488	383, 398, 473	215	Sitostanol (m/z 215)
Foot notes
* RT (retention time) and RTT (relative retention time) corresponding to the sonication-SIM-QP2010 method (see Materials and Methods)
† Compound structure and mass spectra can be found in fig. S2
‡ When compounds were co-eluting, a more specific fragment was chosen for quantification. When the standard was not available, this quantification fragment has been compared to the one corresponding to a similar fragmentation pattern from an available standard
Compounds written in black are the eleven 5β-stanols considered in this study
Compounds written in grey are 5α-stanols and sterol precursors nto considered in this study
