# Supplementary material for: Faecal biomarkers can distinguish specific mammalian species in modern and past environments
Source: PLoS One. 2019 Feb 7;14(2):e0211119. doi: 10.1371/journal.pone.0211119 (PMC6366745; doi:10.1371/journal.pone.0211119)
Supplement: S2 Table — Information relative to sample collection and analytical method as presented in Materials and Methods, 5β-stanol distribution and sum, concentration of main 5α-stanols and recovery efficiency of internal standard when added. (XLSX) [file pone.0211119.s004.xlsx]

## Sheet: Table S2 Samples
Faeces samples						5β-stanol distribution												Main 5⍺-stanols (µg.g-1)						R1 ratio	R2 ratio
Species	Sample ID	Origin	Diet + other information	Composition	Analytical method	Coprostanol	Epicoprostanol	5β-Brassicastanol	5β-Lichestanol	5β-Epibrassicastanol	5β-Campestanol	5β-Epicampestanol	5β-Stigmastanol	5β-Epistigmastanol	24-Ethylcoprostanol	24-Ethylepicoprostanol	Total (µg.g-1)	Cholestanol	Campestanol	Stigmastanol	Sitostanol	Recovery IS		coprostanol / (coprostanol + 24-ethylcoprostanol)	(coprostanol + epicoprostanol) / (24-ethylcoprostanol + 24-ethylepicoprostanol)
Reindeer	R1	Cairngorm mountains, Scotland	Summer	Composite (n > 6)	Sonication-SIM-QP2010	0.105773	0.0413084	0.00284363	0.0189531	0.00239694	0.019048	0.0685256	0.0102167	0.0106649	0.314062	0.406208	2191.01	0	128.051	7.70151	524.854	0.862054		0.25194	0.204204
Rangifer tarandus	R2	Sai͡an Mountains, Russia	Winter	Composite (n > 6)	Sonication-SIM-QP2010	0.152189	0.0853587	0.024645	0.244042	0.014461	0	0.0249191	0.0296206	0.0147777	0.24692	0.163067	714.042	21.7864	64.2982	5.09164	314.677	0.895597		0.381323	0.579404
	R3	Cairngorm mountains, Scotland	Summer, Female	Composite (n > 6)	Sonication-SIM-QP2010	0.111886	0.0304303	0.00721556	0.0741228	0.00537348	0.0975423	0.0216073	0.0575927	0.0246288	0.4408	0.128802	1575.91	77.9104	143.251	29.0673	632.945	0.962791		0.20244	0.249852
	R4	I͡Amal peninsula, Russia	?	Composite (n > 6)	Sonication-SIM-QP2010	0.125383	0.0407503	0.0123622	0.228988	0.00768158	0.0776626	0.0307456	0.0211718	0.0123405	0.285534	0.15738	847.075	46.0398	36.8725	4.93694	157.162	0.83926		0.30513	0.375091
	R5	I͡Amal peninsula, Russia	?	Composite (n > 6)	Sonication-SIM-QP2010	0.0365001	0.112453	0.0255645	0.188111	0.0211521	0.0568459	0.0307066	0.0216357	0.0190748	0.305234	0.182722	137.65	16.6115	6.71382	3.01098	52.7692	0.938418		0.106809	0.30526
	R6	Stora Sjöfallet national park, Sweden	Summer	Composite (n > 6)	Sonication-SIM-QP2010	0.105579	0.0102374	0.0126186	0.164483	0.00614864	0.0513425	0.00614632	0.0546308	0.00700238	0.515376	0.0664355	647.759	32.0805	34.1287	9.24595	418.865	0.854732		0.170026	0.199061
	R7	Stora Sjöfallet national park, Sweden	Summer	Composite (n > 6)	Sonication-SIM-QP2010	0.107894	0.0225533	0.0116315	0.421277	0	0.0259485	0	0.0377559	0.00627148	0.28694	0.0797292	994.255	53.9547	23.7204	10.5825	430.225	0.843487		0.273264	0.355763
	R8	Stora Sjöfallet national park, Sweden	Summer	Composite (n > 6)	Sonication-SIM-QP2010	0.0692142	0.0112669	0.0091127	0.227979	0	0.0273589	0.00509959	0.0274544	0.00545897	0.479448	0.137607	1147.92	29.6723	9.95437	5.38785	187.67	0.842845		0.126151	0.130428
	R9	Stora Sjöfallet national park, Sweden	Summer	Composite (n > 6)	Sonication-SIM-QP2010	0.0870452	0.0562696	0.0176093	0.454565	0.0126297	0.0331832	0.00704013	0.00771034	0.00571684	0.179844	0.138387	1086.49	50.4802	73.9311	9.43775	1024.03	0.694413		0.326147	0.450349
	R10	Stora Sjöfallet national park, Sweden	Summer	Composite (n > 6)	Sonication-SIM-QP2010	0.0913766	0.00905584	0.00784799	0.238407	0	0.0342507	0.00459178	0.0113371	0.00571398	0.516506	0.0809132	1492.77	35.885	38.9085	9.49272	661.02	0.794667		0.150319	0.168111
	R11	Kaamanen, Finland	Winter	Composite (n > 6)	Sonication-SIM-QP2010	0.0906504	0.0434014	0.0200708	0.382175	0.0179234	0.0492894	0.017717	0.0424253	0.027859	0.166515	0.141973	850.073	30.9837	18.3331	6.82348	92.431	0.9002		0.352498	0.434545
	R12	I͡Amal peninsula, Russia	?	Composite (n > 6)	Sonication-SIM-QP2010	0.0944875	0.0283492	0.00971226	0.151495	0.00664307	0.081048	0.032102	0.00818877	0.00781335	0.401855	0.178306	1007.75	42.2212	55.2746	4.30514	428.684	0.87557		0.190367	0.211729
	R13	I͡Amal peninsula, Russia	?	Composite (n > 6)	Sonication-SIM-QP2010	0.0759016	0.0226591	0.00666099	0.0896589	0.00472765	0.0536978	0.0367193	0.00678477	0.00562914	0.454275	0.243286	1311.35	39.845	49.7975	4.86149	704.628	0.862316		0.143163	0.141293
	R14	Stora Sjöfallet national park, Sweden	Winter	Composite (n > 6)	Sonication-SIM-QP2010	0.0972181	0.0393043	0.0261903	0.218874	0.0203857	0.0618795	0.0290274	0.0431383	0.0279448	0.246282	0.189756	420.54	25.9476	28.5835	7.53277	125.45	0.799		0.283022	0.313098
	R15	Stora Sjöfallet national park, Sweden	Winter	Composite (n > 6)	Sonication-SIM-QP2010	0.115725	0.018429	0.0117081	0.118329	0.00908208	0.0555256	0.0105206	0.02281	0.00768211	0.512567	0.117622	857.368	50.2395	109.437	15.1931	1282.16	0.913457		0.18419	0.212879
	R16	Stora Sjöfallet national park, Sweden	Winter	Composite (n > 6)	Sonication-SIM-QP2010	0.0613349	0.0384169	0.0242786	0.464226	0.0215931	0.0305342	0.00942506	0.0258083	0.0170683	0.158718	0.148597	613.366	24.5077	19.2691	6.20699	110.766	0.859632		0.278728	0.324591
	R17	Stora Sjöfallet national park, Sweden	Winter	Composite (n > 6)	Sonication-SIM-QP2010	0.141421	0.0590654	0.0242371	0.308533	0.0249903	0.045506	0.00962698	0.0308425	0.037448	0.195055	0.123274	677.042	40.7956	43.4626	8.93621	188.716	0.793888		0.420299	0.629806
	R18	Stora Sjöfallet national park, Sweden	Winter	Composite (n > 6)	Sonication-SIM-QP2010	0.0930874	0.0431484	0.0241389	0.234148	0.0214365	0.0531521	0.0191723	0.0318425	0.0490781	0.251971	0.178824	499.908	40.2306	44.297	11.9403	216.167	0.777477		0.269773	0.316243
	R19	I͡Amal peninsula, Russia	Winter	Composite	Sonication-SIM-QP2010	0.0679381	0.0168688	0.00524881	0.132329	0.00819116	0.0300993	0.0166568	0.0117178	0.00426158	0.484219	0.22247	4763.45	188.268	221.185	49.2175	4139.75	0.931592		0.123041	0.120006
	R20	I͡Amal peninsula, Russia	Winter	Composite	Sonication-SIM-QP2010	0.0690104	0.0153174	0.00482016	0.114362	0.00920951	0.0374558	0.0145003	0.00770997	0.00395633	0.55721	0.166448	4520.45	198.317	277.461	53.2321	4655.12	0.729631		0.110202	0.11653
	R21	I͡Amal peninsula, Russia	Winter	Composite	Sonication-SIM-QP2010	0.0758873	0.0289518	0.00572307	0.163374	0.00514837	0.0391417	0.0293787	0.011137	0.00536835	0.368572	0.267317	2645.13	101.563	120.169	15.125	1361.08	0.696741		0.170741	0.16487
	R22	Sai͡an Mountains, Russia	Winter	Composite (n > 6)	Saponification-TIC-TRACE DSQ	0.0678298	0.0471235	0.11189	0.229502	0	0.0143048	0.0173921	0.0619488	0.0580828	0.18527	0.206656	686.239	56.0754	65.5935	10.4887	136.651	NA		0.267996	0.293303
	R23	Sai͡an Mountains, Russia	Winter	Composite (n > 6)	Saponification-TIC-TRACE DSQ	0.112522	0.0551736	0.0717059	0.268188	0	0.0439298	0.0214933	0.0729392	0.0611717	0.180816	0.112061	805.304	89.8991	53.4837	17.7425	155.036	NA		0.383592	0.572579
Lemming	L1	Stora Sjöfallet national park, Sweden	?	Composite (n > 10)	Sonication-SIM-QP2010	0.0939377	0	0.0208524	0	0	0.0856096	0.122763	0.109522	0	0.567316	0	41.6882	0	3.14819	1.10215	6.26579	NA		0.14206	0.165583
Lemmus lemmus	L2	Stora Sjöfallet national park, Sweden	?	Composite (n > 10)	Sonication-SIM-QP2010	0.0633489	0	0.00806085	0	0	0.0189014	0	0.0107199	0	0.8876	0.0113686	453.78	0	5.17993	7.01338	135.907	NA		0.0666165	0.0704684
	L3	Stora Sjöfallet national park, Sweden	?	Composite (n > 10)	Sonication-SIM-QP2010	0.09262	0.0303405	0.022695	0	0	0.0579077	0	0.148607	0	0.615712	0.0321185	24.4939	0	2.86313	1.07067	9.52132	NA		0.130758	0.189804
	L4	Stora Sjöfallet national park, Sweden	?	Composite (n > 10)	Sonication-SIM-QP2010	0.123974	0.0369205	0.0287922	0	0	0.0738462	0	0.119429	0	0.617038	0	56.34	0	8.48188	2.67258	26.1466	NA		0.167303	0.260753
	L5	Stora Sjöfallet national park, Sweden	?	Composite (n > 10)	Sonication-SIM-QP2010	0.0618746	0.00900929	0.00651905	0	0	0.0140078	0	0.0100504	0	0.883587	0.0149522	702.086	0	6.86108	5.37015	144.179	NA		0.0654438	0.078888
	L6	Stora Sjöfallet national park, Sweden	?	Composite (n > 10)	Sonication-SIM-QP2010	0.0970805	0.040389	0.0312633	0	0	0.0871527	0	0.1221	0	0.622014	0	44.4158	0	6.4127	2.0857	18.747	NA		0.135004	0.221007
Goat	G1	Tromsø, Norway	Winter, French breed	Composite (n > 4)	Sonication-SIM-QP2010	0.0984435	0.0310142	0.00185123	0.0115739	0.0024358	0.0881342	0.0376521	0.00637974	0.00775365	0.404646	0.310116	2715.48	95.2079	84.1574	3.76505	388.592	NA		0.195678	0.18112
Capra aegagrus	G2	Tromsø, Norway	Summer, grass and herbs	Composite (n > 4)	Sonication-SIM-QP2010	0.102723	0.0313576	0.00256432	0.0165801	0.0030779	0.0620032	0.0575823	0.00550074	0.00875262	0.298714	0.411145	2301.32	101.49	236.882	8.64794	1372.15	NA		0.255888	0.188883
	G3	Vilhelmina, Sweden	Lappish male, summer, fed on grass and herbs	Composite (n < 10)	Sonication-SIM-QP2010	0.0629897	0.0123438	0.00177192	0.0174268	0	0.0252876	0.00990411	0.00381638	0.00368245	0.616577	0.2462	1421.44	31.1021	23.1412	4.21325	635.295	NA		0.0926909	0.087315
	G4	Vilhelmina, Sweden	Lappish male, winter, fed with hay	Composite (n < 10)	Sonication-SIM-QP2010	0.096422	0.0177896	0.00182283	0.0196196	0	0.0430663	0.0133276	0.00458711	0.00346322	0.511054	0.288848	1200.69	33.0384	34.1644	4.09203	569.447	NA		0.158726	0.142782
	G5	Vilhelmina, Sweden	Lappish female, summer, fed on grass and herbs	Composite (n < 10)	Sonication-SIM-QP2010	0.0881783	0.0101494	0.00169369	0.0208891	0	0.0610125	0.0139497	0.00508768	0.00274788	0.59457	0.201721	1589.05	35.4812	47.0392	4.76145	594.639	NA		0.129152	0.123482
	G6	Vilhelmina, Sweden	Lappish female, field 2, summer, fed on grass and herbs	Composite (n < 10)	Sonication-SIM-QP2010	0.0683358	0.0158709	0.00160033	0.0163198	0	0.0236182	0.0118033	0.0052046	0.00425383	0.605545	0.247448	1626.3	33.6746	28.9881	5.88531	727.607	NA		0.101406	0.0987192
	G7	Vilhelmina, Sweden	Lappish female, summer	Composite (n < 10)	Sonication-SIM-QP2010	0.064761	0.0232585	0.00207288	0.0201653	0	0.0286478	0.0136721	0.00381287	0.00493143	0.544173	0.294506	1287.53	37.8121	24.9295	4.18949	477.127	NA		0.106352	0.10495
	G8	Vilhelmina, Sweden	Lappish female, summer	Composite (n < 10)	Sonication-SIM-QP2010	0.0846349	0.0178857	0.00154665	0.0136001	0	0.0636527	0.0220069	0.00895668	0.00776695	0.535797	0.244152	1851.6	56.9494	70.7839	8.20358	603.909	NA		0.136413	0.131445
	G9	Vilhelmina, Sweden	Lappish female, winter	Composite (n < 10)	Sonication-SIM-QP2010	0.134364	0.018401	0.00254975	0	0.00263805	0	0.0151319	0.00793311	0.005232	0.58566	0.22809	1059.65	0	83.6728	4.37641	478.073	NA		0.18661	0.187729
Sheep	S1	Vilhelmina, Sweden	Summer, grass and herbs	Composite (n < 10)	Sonication-SIM-QP2010	0.176654	0.0137586	0.00218432	0	0	0.10717	0.00794694	0.00914708	0.00317417	0.593078	0.0868862	1087.86	92.0208	97.6629	4.89825	471.14	NA		0.229501	0.280034
Ovis aries	S2	Vilhelmina, Sweden	Summer, grass and herbs	Composite (n < 10)	Sonication-SIM-QP2010	0.19747	0.0375471	0.00301316	0.0307146	0	0.10771	0.0279141	0.0156466	0.00955323	0.499191	0.0712403	1111.99	52.9247	90.773	10.4251	664.114	NA		0.283452	0.411998
	S3	Vilhelmina, Sweden	Summer, grass and herbs	Composite (n < 10)	Sonication-SIM-QP2010	0.138394	0.0102228	0.0030584	0.0308201	0	0.0842544	0.00775691	0.013354	0.00363691	0.627869	0.0806328	1470.84	42.0355	68.7013	7.91536	461.678	NA		0.180609	0.209763
	S4	Vilhelmina, Sweden	Summer, grass and herbs	Composite (n < 10)	Sonication-SIM-QP2010	0.0818332	0.0144422	0.00211957	0.0248428	0	0.0486649	0.0151649	0.00769026	0.00477673	0.625585	0.17488	1736.56	40.1551	44.7209	6.72127	460.309	NA		0.115679	0.120274
	S5	Vilhelmina, Sweden	Summer, grass and herbs	Composite (n < 10)	Sonication-SIM-QP2010	0.078995	0.0115472	0.00236119	0.0228173	0.00383595	0.0624994	0.0107191	0.0100463	0.00450484	0.648059	0.144615	1933.51	603.072	77.7026	7.12624	701.024	NA		0.108651	0.114224
	S6	Vilhelmina, Sweden	Winter	Composite (n < 10)	Sonication-SIM-QP2010	0.237535	0.0330408	0.00161108	0.0200067	0	0.0652865	0.0249128	0.00607238	0.00480965	0.372764	0.23396	1372.45	132.306	118.247	6.36922	701.563	NA		0.389211	0.445962
	S7	Vilhelmina, Sweden	Winter	Composite (n < 10)	Sonication-SIM-QP2010	0.112972	0.0243767	0.00227366	0.0345369	0	0.0720901	0.021428	0.0141246	0.00695141	0.544386	0.166861	2293.29	80.0753	91.3043	11.5017	569.167	NA		0.171857	0.193109
	S8	Brittany, France	Winter, fresh female manure	Composite (n > 10)	ASE-SIM-QP2010	0.208011	0.0261256	0.0292938	0.00777014	0.00905638	0.0972484	0.0202112	0.0338708	0.00862582	0.500384	0.0594026	473.164	21.4187	23.0625	2.63927	84.9227	NA		0.293637	0.418261
	S9	Brittany, France	winter, fresh lamb manure	Composite (n > 10)	ASE-SIM-QP2010	0.330061	0.0125247	0.011652	0.0122803	0	0.0872582	0.00811127	0.0242418	0.00383123	0.470594	0.0394462	1518.64	41.0298	75.9741	8.73691	285.01	NA		0.412239	0.671683
	S10	Brittany, France	1-year old manure from female	Composite (n > 10)	ASE-SIM-QP2010	0.0862566	0.00947308	0.00594617	0.00371886	0	0.0497015	0.00598473	0.0121552	0.00237399	0.736703	0.0876871	2597.3	42.9856	80.6931	11.4964	572.456	NA		0.104813	0.116122
	S11	Brittany, France	3-weeks old manure from lamb	Composite (n > 10)	ASE-SIM-QP2010	0.127864	0.0223868	0.0241224	0.00825431	0	0.100593	0.0177704	0.030773	0.00761028	0.556417	0.104208	676.359	29.9724	40.2586	3.91429	139.331	NA		0.186859	0.227438
	S12	Brittany, France	1-year old manure from lamb	Composite (n > 10)	ASE-SIM-QP2010	0.149716	0.0345771	0.0181189	0.00701823	0	0.0723219	0.0170642	0.0222156	0.00800378	0.473077	0.197888	768.121	30.287	76.7019	4.91945	523.827	NA		0.240394	0.274669
Horse	H1	Aberdeenshire, Scotland	Summer, grass and hay	1 individual	Sonication-SIM-QP2010	0.0830425	0.0798494	0.00377513	0.0350314	0.00490843	0.0779498	0.0341618	0.00936173	0.0126333	0.367286	0.292	1064.26	74.6924	69.5959	4.46088	315.901	NA		0.184404	0.247073
Equus ferus caballus	H2	Aberdeenshire, Scotland	Summer, grass and hay	1 individual	Sonication-SIM-QP2010	0.092186	0.0887574	0.00521077	0.0548682	0.00633019	0.0674659	0.0331018	0.00906677	0.0122569	0.308869	0.321887	1059.17	75.5674	39.1242	4.23451	239.01	NA		0.229859	0.286867
	H3	Sai͡an Mountains, Russia	Winter	1 individual	Sonication-SIM-QP2010	0.0826781	0.10511	0.00317519	0.0376499	0.00447765	0.0438604	0.048172	0.00753013	0.012893	0.265356	0.389097	1456.5	57.1606	24.6885	3.58045	176.721	NA		0.237557	0.28694
	H4	Aberdeenshire, Scotland	Grass and hay	Composite (n = 3)	Sonication-SIM-QP2010	0.0733966	0.114514	0.0040102	0.0588174	0.00489266	0.0713153	0.0370829	0.0130627	0.0164998	0.312717	0.293692	550.394	24.6597	13.9985	1.5548	77.8026	NA		0.19009	0.309874
	H5	Aberdeenshire, Scotland	Grass and hay	Composite (n = 2)	Sonication-SIM-QP2010	0.114122	0.0598957	0.00367766	0.0324882	0.00396355	0.110074	0.0172322	0.0117966	0.00723506	0.493951	0.145563	733.937	52.4637	43.7451	2.48507	188.021	NA		0.187679	0.27211
	H6	Sai͡an Mountains, Russia	Winter	1 individual	Saponification-TIC-TRACE DSQ	0.10947	0.114582	0.00733396	0.0148224	0	0.048463	0.0446942	0.0418151	0.0458313	0.275677	0.297311	734.894	64.9061	40.0072	6.85957	76.178	NA		0.28423	0.391025
	H7	Sai͡an Mountains, Russia	Winter	1 individual	Saponification-TIC-TRACE DSQ	0.09887	0.105273	0.00572774	0.0142204	0	0.0401828	0.0430721	0.0373864	0.0439508	0.270151	0.341166	894.131	73.1056	47.4913	11.3781	98.5885	NA		0.267925	0.333939
Moose	M1	Ranua, Finland	Winter	1 individual	Sonication-SIM-QP2010	0.0136697	0.0116202	0	0	0	0.0173603	0.0455899	0.0107125	0	0.180583	0.720464	1439.55	7.1252	0	0	66.7622	NA		0.0703704	0.0280672
Alces alce	M2	Stora Sjöfallet national park, Sweden	Summer (fresh)	1 individual	Sonication-SIM-QP2010	0.0497275	0.041791	0	0.0206512	0	0.0219109	0.0129079	0	0	0.691662	0.16135	1453.15	24.9182	27.8732	0	2191.16	NA		0.0670733	0.107289
	M3	Bajkas, Sweden	Autumn	1 individual	Sonication-SIM-QP2010	0.00687508	0.0120666	0	0	0	0.0125637	0.0527708	0.00365629	0.00491814	0.142705	0.764445	3524.89	9.15534	0	0	86.0177	NA		0.0459626	0.0208804
	M4	Stora Sjöfallet national park, Sweden	Winter	1 individual	Sonication-SIM-QP2010	0.0379037	0.00792512	0	0.0133047	0	0.0112413	0.0125615	0.00701962	0	0.442966	0.467078	1263.25	8.48037	1.99512	0	528.813	NA		0.0788233	0.0503589
	M5	Stora Sjöfallet national park, Sweden	Winter	1 individual	Sonication-SIM-QP2010	0.029035	0.00605014	0	0.0119351	0	0.00841295	0.00680706	0	0	0.551769	0.385991	882.012	3.75876	0.232164	0	117.564	NA		0.0499911	0.0374138
Cow	C1	Vilhelmina, Sweden	Summer, old lappish breed	1 individual	Sonication-SIM-QP2010	0.0922842	0.0362322	0.00305592	0.0292596	0.00325904	0.0609827	0.0218712	0.0105243	0.00778034	0.489934	0.244817	1006.34	41.7673	43.0426	3.74187	328.221	NA		0.158505	0.174912
Bos taurus	C2	Brittany, France	Details in Derrien et al., 2011, 2012	Composite	ASE-SIM-QP2010	0.161602	0.0733246	0.00844602	0.0130096	0.00293196	0.111678	0.0440615	0.016793	0.00930064	0.318357	0.240496	1648.84	180.869	143.864	10.8018	548.776	NA		0.336699	0.420372
	C3	Brittany, France	Details in Derrien et al., 2011, 2012	Composite	ASE-SIM-QP2010	0.116003	0.076075	0.0114745	0.00916288	0.00403112	0.0570131	0.0699729	0.0281133	0.0271555	0.195648	0.405351	1290.37	55.1009	59.2404	11.5226	306.815	NA		0.372221	0.319598
	C4	Brittany, France	Details in Derrien et al., 2011, 2012	Composite	ASE-SIM-QP2010	0.114635	0.0725934	0.0150125	0.0100437	0.00425945	0.101027	0.0611077	0.0367195	0.0230662	0.24623	0.315306	879.922	112.206	89.4629	10.8775	273.676	NA		0.317667	0.333422
	C5	Brittany, France	Details in Derrien et al., 2011, 2012	Composite	ASE-SIM-QP2010	0.14263	0.0727472	0.00857279	0.00860822	0.00348545	0.102146	0.0900579	0.0285162	0.0251463	0.247098	0.270992	2307.41	195.943	177.143	24.8881	609.115	NA		0.365972	0.415713
	C6	Brittany, France	Details in Derrien et al., 2011, 2012	Composite	ASE-SIM-QP2010	0.163666	0.0495911	0.0283836	0.0150015	0.00825239	0.0880559	0.0608763	0.0365529	0.0219133	0.232641	0.295066	463.35	49.5297	63.5073	5.26363	155.769	NA		0.412978	0.404119
	C7	Brittany, France	,	Composite	ASE-SIM-QP2010	0.162375	0.0515418	0.0516199	0.0122314	0.0146436	0.107287	0.0550007	0.0576787	0.023781	0.207933	0.255908	253.871	30.9425	30.8848	3.54032	70.7159	NA		0.438486	0.461185
	C8	Brittany, France	Details in Derrien et al., 2011, 2012	Composite	ASE-SIM-QP2010	0.117539	0.0515866	0.0108072	0.00609116	0.003424	0.0813863	0.0640079	0.0373176	0.0233414	0.257356	0.347142	1300.54	160.37	138.09	18.5349	387.311	NA		0.313525	0.279779
	C9	Brittany, France	Details in Derrien et al., 2011, 2012	Composite slurry	ASE-SIM-QP2010	0.116941	0.0624816	0.0100748	0.00316554	0.00349372	0.0789503	0.0687928	0.0347351	0.0281208	0.243696	0.349548	1422.19	161.966	129.405	19.8655	450.07	NA		0.324263	0.302444
Pig	P1	Brittany, France	Details in Derrien et al., 2011, 2012	Composite slurry	ASE-SIM-QP2010	0.37583	0.0792492	0.00404082	0.00510361	0.000851145	0.137228	0.00947276	0.0133083	0.00117634	0.320787	0.0529535	6474.59	888.492	290.05	3.91969	387.357	NA		0.539507	1.21763
Sus scrofa domesticus	P2	Brittany, France	Details in Derrien et al., 2011, 2012	Composite slurry	ASE-SIM-QP2010	0.201854	0.182637	0.00871512	0.00482439	0.0029912	0.106684	0.0265173	0.0180561	0.00601406	0.294134	0.147573	1676.98	178.907	102.745	4.16119	206.394	NA		0.406974	0.870467
	P3	Brittany, France	Details in Derrien et al., 2011, 2012	Composite slurry	ASE-SIM-QP2010	0.328322	0.0981809	0.00291117	0.00236942	0.00063258	0.151864	0.009481	0.00998947	0.00101558	0.33351	0.0617245	7974.89	1211.1	580.253	7.30533	747.078	NA		0.496081	1.07911
	P4	Brittany, France	Details in Derrien et al., 2011, 2012	Composite slurry	ASE-SIM-QP2010	0.277552	0.153428	0.00591227	0.00563102	0	0.152918	0.0197828	0.0152168	0.00262803	0.264203	0.102728	2961.58	452.879	287.573	4.60739	439.439	NA		0.51232	1.17455
	P5	Brittany, France	Details in Derrien et al., 2011, 2012	Composite slurry	ASE-SIM-QP2010	0.292247	0.133592	0.00619793	0.00501338	0.00280942	0.151538	0.0180431	0.0145238	0.00228227	0.289429	0.0843232	3826.91	579.923	304.694	4.70853	447.887	NA		0.502422	1.13936
	P6	Brittany, France	Details in Derrien et al., 2011, 2012	Composite slurry	ASE-SIM-QP2010	0.341581	0.0764263	0.0337203	0.00336072	0	0.115332	0.0246525	0.0367408	0.00929965	0.315232	0.0436545	406.302	46.8597	24.4034	2.09219	26.8214	NA		0.520058	1.16473
	P7	Brittany, France	Details in Derrien et al., 2011, 2012	Composite slurry	ASE-SIM-QP2010	0.374213	0.0742393	0.0190194	0.00575916	0	0.117024	0.0153369	0.0245812	0.0052925	0.320971	0.0435633	737.847	86.346	42.1715	2.19037	52.3635	NA		0.538293	1.2302
Dog	D1	Tromsø, Norway	?	1 individual	Sonication-SIM-QP2010	0.853712	0.113492	0	0	0	0.0196031	0	0	0	0.013193	0	794.392	250.183	40.7739	0	121.97	NA		0.984782	73.3122
Canis lupus familiaris	D2	I͡Amal peninsula, Russia	?	1 individual	Sonication-SIM-QP2010	0.522171	0.0385386	0.0393081	0.107593	0.00823873	0.0737918	0	0	0.0410589	0.156618	0.0126811	400.49	32.6388	1.78867	0	14.9783	NA		0.769268	3.31194
	D3	Vilhelmina, Sweden	?	1 individual	Sonication-SIM-QP2010	0.428622	0.0366603	0	0	0	0.219891	0	0	0	0.314827	0	55.225	237.078	89.9943	0	210.035	NA		0.576531	1.4779
	D4	Vilhelmina, Sweden	?	1 individual	Sonication-SIM-QP2010	0.442925	0.0414636	0	0	0	0.250652	0	0	0	0.264959	0	18.2983	59.9056	17.3688	0	23.5868	NA		0.625703	1.82816
Human	Hu1	Brittany, France	Details in Derrien et al., 2012	WWTP influent	SPE-SIM-QP2010	0.735287	0.0369034	0	0	0	0.0307744	0.00878599	0.0222431	0.00474919	0.161256	0	1169.49	14.2534	13.7596	0	41.6923	NA		0.820136	4.78859
Homo sapiens	Hu2	Brittany, France	Details in Derrien et al., 2012	WWTP influent	SPE-SIM-QP2010	0.512077	0.0371202	0.0499521	0.0061771	0.014213	0.142081	0.0302229	0.0501172	0.0139639	0.144076	0	273.721	8.31053	10.5133	2.49916	11.4494	NA		0.780423	3.81186
	Hu3	Brittany, France	Details in Derrien et al., 2012	WWTP influent	SPE-SIM-QP2010	0.583582	0.0468004	0.0569273	0.00569877	0.0161976	0.0955403	0	0.0505896	0.0191801	0.0508127	0.0746715	240.182	8.31053	10.5133	2.49916	11.4494	NA		0.919904	5.0236
	Hu4	Brittany, France	Details in Derrien et al., 2012	WWTP influent	SPE-SIM-QP2010	0.697213	0.0215734	0.020395	0.00220441	0.00579123	0.045271	0.0122302	0.0183946	0.00720864	0.162799	0.00691929	672.447	8.37835	9.34039	0	8.73196	NA		0.810701	4.23516
	Hu5	Brittany, France	Details in Derrien et al., 2012	WWTP influent	SPE-SIM-QP2010	0.486686	0.0519449	0.0469275	0.00245703	0.0137167	0.0841561	0.0294338	0.0463868	0.0140673	0.204199	0.020025	283.814	8.18182	9.80982	1.93955	7.60608	NA		0.704438	2.4022
	Hu6	Brittany, France	Details in Derrien et al., 2012	WWTP influent	SPE-SIM-QP2010	0.634357	0.0195359	0.0138562	0.0142109	0.00331602	0.0498075	0.0074644	0.0201517	0.00386238	0.229315	0.00412232	1155.21	10.947	26.5508	2.65799	35.6861	NA		0.734488	2.80115
	Hu7	Brittany, France	Details in Derrien et al., 2012	WWTP influent	SPE-SIM-QP2010	0.699155	0.0169374	0.0229092	0.0026334	0.0465108	0.0597239	0.0160932	0.02085	0.084844	0.0219729	0.00836974	602.263	8.01023	8.77087	12.5259	2.39157	NA		0.96953	23.6002
	Hu8	Brittany, France	Details in Derrien et al., 2012	WWTP influent	SPE-SIM-QP2010	0.484141	0.0241413	0.0104558	0.0114065	0.110889	0.161796	0.0124831	0.00779344	0.146305	0.0101698	0.0204192	2136.82	8.1651	101.826	0	2.67313	NA		0.979426	16.6165
						5β-stanol distribution (%)												Main 5⍺-stanols (µg.g-1)
Soil samples	Sample ID	Origin	Context	Date	Analytical method	Coprostanol	Epicoprostanol	5β-Brassicastanol	5β-Lichestanol	5β-Epibrassicastanol	5β-Campestanol	5β-Epicampestanol	5β-Stigmastanol	5β-Epistigmastanol	24-Ethylcoprostanol	24-Ethylepicoprostanol	Total (µg.g-1)	Cholestanol	Campestanol	Stigmastanol	Sitostanol	Recovery IS (%)
Sai͡an site	Saian1	Sai͡an Mountains, Russia	Control sample - off-site sub-surface	2000-2014	Saponification-TIC-TRACE DSQ	0	0	0	0	0	0	0	0	0	0	0	0	1.60705	2.62327	2.55035	6.2991	NA
	Saian2	Sai͡an Mountains, Russia	Sub-surface	2000-2014	Saponification-TIC-TRACE DSQ	0.164204	0.138199	0	0.0480931	0	0.0414713	0.0434181	0	0.102809	0.331134	0.130672	3.20947	0.682179	0.790593	0	2.41611	NA
	Saian3	Sai͡an Mountains, Russia	Sub-surface	2000-2014	Saponification-TIC-TRACE DSQ	0.141904	0.0837352	0.0783873	0.146465	0	0.0510717	0.0441131	0	0.0702069	0.318741	0.0653754	7.0312	1.55184	0.877365	0.401547	2.61728	NA
	Saian4	Sai͡an Mountains, Russia	Sub-surface	2000-2014	Saponification-TIC-TRACE DSQ	0.117691	0.0578082	0.0534747	0.150625	0	0.0439655	0.0548677	0.0617446	0.0751486	0.248795	0.13588	11.0715	2.37511	2.19817	0.652935	5.81362	NA
	Saian5	Sai͡an Mountains, Russia	Sub-surface	2000-2014	Saponification-TIC-TRACE DSQ	0.145807	0.0642301	0.144936	0.11014	0	0.0307802	0.0471115	0	0.040633	0.278041	0.13832	6.20157	2.55119	1.2456	0.383989	3.64006	NA
	Saian6	Sai͡an Mountains, Russia	Sub-surface	2000-2014	Saponification-TIC-TRACE DSQ	0.0946387	0.0750798	0.0497343	0.0614539	0	0.033511	0.0474907	0.0456853	0.0378554	0.416274	0.138276	20.4257	3.60739	1.93732	1.42374	12.2739	NA
	Saian7	Sai͡an Mountains, Russia	Sub-surface	2000-2014	Saponification-TIC-TRACE DSQ	0.122868	0.0809279	0.0599638	0.218474	0	0.025668	0.0280657	0	0.0353334	0.326381	0.102318	20.3756	4.17953	3.27212	1.37949	14.0937	NA
	Saian8	Sai͡an Mountains, Russia	Sub-surface	2000-2014	Saponification-TIC-TRACE DSQ	0.111044	0.104636	0.119957	0.235838	0	0	0.111847	0	0	0.159074	0.157604	2.91718	1.6493	2.21671	0.580348	11.6647	NA
I͡Amal site	Iamal1	Iamal peninsula, Russia	Control sample - off-site B horizon	2000-2014	SIM-QP2010	0	0	0	0	0	0	0	0	0	0.721095	0.278905	0.00478682	0.0031725	0.00637224	0.00148218	0.059925	0.641076
	Iamal2	I͡Amal peninsula, Russia	2nd Buried A horizon	From AD 412 to AD 1037 (95.4% confidence)	SIM-QP2010	0.0880478	0.031455	0.0637395	0.345485	0.0181456	0	0	0.0170262	0.00865942	0.274125	0.153316	1.55773	0.312586	1.1429	0.0602221	3.73953	0.947658
	Iamal3	I͡Amal peninsula, Russia	2nd Buried A horizon	From AD 412 to AD 1037 (95.4% confidence)	SIM-QP2010	0.409423	0.0861519	0.0398631	0.28062	0.01977	0.00388923	0	0.00796827	0.00608071	0.0792392	0.0669943	2.83281	0.338352	1.1366	0.0557458	5.25748	1.25287
	Iamal4	I͡Amal peninsula, Russia	2nd Buried A horizon	From AD 412 to AD 1037 (95.4% confidence)	SIM-QP2010	0.669374	0.187467	0.00568593	0.0473525	0.00284455	0.00235877	0	0.00217095	0.0014085	0.0561606	0.0251773	12.365	0.596226	1.04062	0.0832883	5.58414	1.03378
	Iamal5	I͡Amal peninsula, Russia	1st Buried A horizon	From AD 412 to AD 1037 (95.4% confidence)	SIM-QP2010	0.127933	0.0424514	0.0348238	0.381235	0.0252719	0	0	0.0256756	0.0138019	0.231792	0.117016	1.14485	0.0710867	0.698647	0.0320787	2.45412	0.778888
	Iamal6	I͡Amal peninsula, Russia	2nd Buried A horizon	From AD 412 to AD 1037 (95.4% confidence)	SIM-QP2010	0.219302	0.0775591	0.0471107	0.240488	0.0234204	0	0	0.0111568	0.00816752	0.271585	0.10121	3.73315	0.175983	1.65457	0.143548	9.61423	1.59928
	Iamal7	I͡Amal peninsula, Russia	1st Buried A horizon	From AD 412 to AD 1037 (95.4% confidence)	SIM-QP2010	0.125344	0.0200835	0.0659985	0.369663	0.018808	0	0	0.0160119	0.010901	0.25056	0.12263	1.55043	0.110628	0.993001	0.0340978	3.6091	0.9741
	Iamal8	I͡Amal peninsula, Russia	1st Buried A horizon	From AD 412 to AD 1037 (95.4% confidence)	SIM-QP2010	0.175911	0.0463624	0.0450696	0.357308	0.0222774	0	0	0.0140736	0.010434	0.225209	0.103355	2.25563	0.108386	1.47221	0.0982212	3.96009	1.0357
	Iamal9	I͡Amal peninsula, Russia	2nd Buried A horizon	From AD 412 to AD 1037 (95.4% confidence)	SIM-QP2010	0.303465	0.0761579	0.0281815	0.0709805	0.00790898	0	0.00978663	0.0386102	0.0817246	0.255114	0.128071	7.57079	1.2342	0.562674	0.0572139	4.53868	0.883472
