# Supplementary material for: Faecal biomarkers can distinguish specific mammalian species in modern and past environments
Source: PLoS One. 2019 Feb 7;14(2):e0211119. doi: 10.1371/journal.pone.0211119 (PMC6366745; doi:10.1371/journal.pone.0211119)
Supplement: S3 Table — Red text indicates outliers. The radiocarbon calibration multiplot provides a graphical summary of the data in the S2 Table. The results show that the buried soils adjacent to I͡Arte 6, which contained faecal lipids, developed between the 6th and early 11th century AD. (XLSX) [file pone.0211119.s005.xlsx]

## Sheet: Table S3 IAMAL AMS Dating
Context	14C lab ref	14C sample context	Material dated	14C age (BP)	Calibrated date (AD)*	Confidence interval	Comments
Iarte 6 Test Pit 30/60	Poz-80400	1st Buried A horizon	Salix charcoal (Salix sp) roundwood	1140 ± 30	884-986	0.954
	Poz-80401	1st Buried A horizon	Salix charcoal (Salix sp) roundwood	1110 ± 30	891-991	0.954
	Poz-80403	1st Buried A horizon	Salix charcoal (Salix sp) roundwood	1050 ± 30	898-1021	0.954
	Poz-80404	2nd Buried A horizon	Salix charcoal (Salix sp) roundwood	1130 ± 30	770-900	0.954
	Poz-80430	2nd Buried A horizon	Salix charcoal (Salix sp) roundwood	1255 ± 30	735-870	0.954
	Poz-80471	2nd Buried A horizon	Salix charcoal (Salix sp) roundwood	1300 ± 30	736-871	0.954
	Poz-80472	3rd Buried A horizon	Salix charcoal (Salix sp) roundwood	1275 ± 30	695-772	0.954
	Poz-80473	3rd Buried A horizon	Birch charcoal (Betula sp) roundwood	1240 ± 30	691-779	0.954
	Poz-80474	3rd Buried A horizon	Birch charcoal (Betula sp) roundwood	1200 ± 30	692-795	0.954
	Poz-80475	4th Buried A horizon	Birch charcoal (Betula sp) roundwood	6750 ± 40	5713 BC-5623 BC	0.954	Outlier. Ancient wood (probably preserved in peat or permafrost). Omitted from the multiplot.
	Poz-80477	4th Buried A horizon	Birch charcoal (Betula sp) roundwood	6730 ± 40	5711 BC-5572 BC	0.954	Outlier. Ancient wood (probably preserved in peat or permafrost). Omitted from the multiplot.
	Poz-80478	4th Buried A horizon	Birch charcoal (Betula sp) roundwood	1285 ± 30	658-717	0.954
Iarte 6 Test Pit 20/75	Poz-80393	1st Buried A horizon	Salix charcoal (Salix sp) roundwood	1660 ± 30	260-529	0.954	Residual charcoal.
	Poz-80394	1st Buried A horizon	Salix charcoal (Salix sp) roundwood	1580 ± 30	410-546	0.954	Residual charcoal.
	Poz-80395	1st Buried A horizon	Birch charcoal (Betula sp) roundwood	1530 ± 30	428-599	0.954
	Poz-80396	2nd Buried A horizon	Birch charcoal (Betula sp) roundwood	1525 ± 30	428-604	0.954
	Poz-80397	2nd Buried A horizon	Salix charcoal (Salix sp) roundwood	1485 ± 30	474-464	0.954
	Poz-80399	2nd Buried A horizon	Salix charcoal (Salix sp) roundwood	1440 ± 30	566-655	0.954
Reference
* Radiocarbon dates were calibrated and phase modelled using Oxcal 4.3.2 [48] using the IntCal 13 calibration atmospheric curve from Reimer et al. [50]
Radiocarbon Calibration Multiplot
