# Supplementary material for: Faecal biomarkers can distinguish specific mammalian species in modern and past environments
Source: PLoS One. 2019 Feb 7;14(2):e0211119. doi: 10.1371/journal.pone.0211119 (PMC6366745; doi:10.1371/journal.pone.0211119)
Supplement: S4 Table — Characteristics of the HCPC model built on the PCA. Variables and species loadings on PCs 1, 2, 3 and 4 show which variables contribute the most (absolute value) to distinguish between species as represented by “General distinction” regression coefficient and related relevant significantly distinguished species. For each PC, the more two species have a high loading difference (relative value) the more they are distinguished by this PC. For the HCPC model, the main variables (or compounds) explaining the hierarchical cluster tree building have the highest absolute v.test/Etat2 values. The species fingerprints gathered within the main clusters are identified and the main variables responsible for the distinction between main clusters are given by the highest v.test values. (XLSX) [file pone.0211119.s006.xlsx]

## Sheet: Table S4 All species PCA
Principal component		PC1		PC2		PC3		PC4			R code for PCA and weighted HCPC
Explained variance (%)		29.14		21.147		15.264		11.559
Cumulative explained variance (%)		29.14		50.288		65.553		77.11			##PCA/HCPC All species all compounds
		p-value*	Load.†	p-value	Load.	p-value	Load.	p-value	Load.		all.PCA<-all[, c("Coprostanol", "Epicoprostanol",
Active quantitative variables	Coprostanol	1.77791e-05	0.435606	8.61268e-18	-0.754753	0.0111163	-0.266503	0.0416324	-0.215222		"Brassicastanol", "Lichestanol", "Epibrassicastanol", "Campestanol", "Epicampestanol", "Stigmastanol", "Epistigmastanol", "X24Ethylcoprostanol", "X24Ethylepicoprostanol", "Species")]
	Epicoprostanol	3.50252e-07	0.506565	n.s.	n.s.	2.38211e-06	-0.473903	n.s.	n.s.
	5β-Brassicastanol	2.75885e-14	0.695642	n.s.	n.s.	8.70377e-09	0.56125	0.0145424	0.25683		d=all[1:90,13]
	5β-Lichestanol	0.00372537	0.302764	6.50052e-06	0.455353	1.3423e-06	0.484035	3.07765e-05	-0.424296
	5β-Epibrassicastanol	1.90065e-16	0.733882	n.s.	n.s.	n.s.	n.s.	0.000612631	-0.354291		res<-PCA(all.PCA , scale.unit=TRUE, ncp=7, quali.sup=c(12: 12), graph = FALSE,row.w=d)
	5β-Campestanol	0.0015011	0.329813	4.96888e-07	-0.500854	0.000672255	-0.351844	0.000463128	0.361548
	5β-Epicampestanol	0.0249466	0.236297	5.21098e-11	0.623575	8.28026e-05	-0.402815	7.67398e-06	0.452179		res.hcpc<-HCPC(res ,nb.clust=-1,consol=FALSE,min=3,max=10,graph=TRUE)
	5β-Stigmastanol	4.44352e-05	0.416494	n.s.	n.s.	0.000610232	0.354395	1.7513e-11	0.635269
	5β-Epistigmastanol	1.87433e-21	0.802639	0.00128955	0.334104	n.s.	n.s.	n.s.	n.s.		plot.PCA(res, axes=c(1, 2), choix="ind", habillage="none", col.ind="black",
	24-Ethylcoprostanol	1.38766e-20	-0.792321	n.s.	n.s.	0.00156728	0.354395	0.0244536	0.237085		col.ind.sup="blue", col.quali="magenta", label=c("ind", "ind.sup", "quali"),
	24-Ethylepicoprostanol	n.s.	n.s.	1.303e-29	0.876016	0.00156728	-0.328584	n.s.	n.s.		new.plot=TRUE)
Species distinction	General distinction	8.89548e-14	0,62§	2.24092e-28	0.841683	8.05457e-18	0.70492	2.11545e-11	0.564989		plot.PCA(res, axes=c(1, 2), choix="var", new.plot=TRUE, col.var="black",
	Human	1.28595e-05	2.74144	7.53738e-05	-1.63812	n.s.	n.s.	0.043801	-0.809874
	Dog	n.s.	n.s.	2.32668e-06	-3.01534	0.014423	-1.25831	0.0013087	-1.78548		col.quanti.sup="blue", label=c("var", "quanti.sup"), lim.cos2.var=0)
	Pig	n.s.	n.s.	0.00646475	-1.15799	0.00355609	-1.07075	0.032393	0.835777		summary(res, nb.dec = 3, nbelements=10, nbind = 10, ncp = 3, file="")
	Cow	0.0472671	1.33376	0.0273158	1.40374	0.020815	-0.659421	0.000721573	1.14305
	Goat	0.00134947	-1.58034	n.s.	n.s.	n.s.	n.s.	n.s.	n.s.		dimdesc(res,axe=1:4)
	Horse	n.s.	n.s.	0.0339413	1.51462	0.0112482	-0.90064	n.s.	n.s.		res.hcpc$desc.var
	Lemming	0.017766	-1.46335	0.00458769	-1.35126	2.26746e-06	2.58856	0.000235528	1.55574		res.hcpc$desc.axes
	Moose	0.000165881	-2.64807	0.00956982	2.048	n.s.	n.s.	n.s.	n.s.		remove(all.PCA)
	Reindeer	0.0251927	0.928201	9.93854e-05	1.37692	4.06656e-07	1.40157	0.00133319	-0.681998		remove(res.hcpc)
	Sheep	0.0185671	-0.923446	n.s.	n.s.	n.s.	n.s.	n.s.	n.s.
* Significant threshold a = 0.05. No value means p > 0.05
† Loading on the principal component
‡ Non-significant at 0.05 level
§ Regression coefficient
HCPC cluster building		General		Cluster 1		Cluster 2		Cluster 3
	Species			Sheep, Goat, Lemming, Moose		Human, Pig, Dog		Cow, Horse, Winter-reindeer
		p-value	v.test/Eta2	p-value	v.test	p-value	v.test	p-value	v.test
Active quantitative variables	Coprostanol	2.43242e-26	0.742265	3.74519e-06	-4.62504	4.42567e-16	8.12631	0.020713	-2.31318
	Epicoprostanol	8.6798e-13	0.47189	1.1123e-10	-6.45084	0.00228377	3.05061	6.06462e-06	4.52412
	5β-Brassicastanol	0.000276881	0.17165	0.000253522	-3.65868	n.s.	n.s.	0.000769324	3.3636
	5β-Lichestanol	2.91922e-05	0.213401	n.s.	n.s.	0.00176781	-3.1267	0.000122666	3.84074
	5β-Epibrassicastanol	0.00016066	0.181951	7.84708e-05	-3.94902	n.s.	n.s.	0.0020928	3.07674
	5β-Campestanol	2.81105e-05	0.214084	0.00655963	-2.71841	1.36894e-05	4.34879	n.s.	n.s.
	5β-Epicampestanol	4.14656e-05	0.207029	n.s.	n.s.	0.0075857	-2.66997	6.01495e-05	4.01222
	5β-Stigmastanol	0.0351427	0.0740854	n.s.	n.s.	n.s.	n.s.	0.0116202	2.52347
	5β-Epistigmastanol	1.35075e-08	0.340684	2.16137e-06	-4.73772	n.s.	n.s.	2.53552e-07	5.15506
	24-Ethylcoprostanol	5.60212e-16	0.553946	3.73776e-12	6.94676	2.69338e-06	-4.69292	0.000378337	-3.55475
	24-Ethylepicoprostanol	5.87552e-09	0.353181	n.s.	n.s.	9.20427e-08	-5.34177	0.00118907	3.24149
