# Supplementary material for: Faecal biomarkers can distinguish specific mammalian species in modern and past environments
Source: PLoS One. 2019 Feb 7;14(2):e0211119. doi: 10.1371/journal.pone.0211119 (PMC6366745; doi:10.1371/journal.pone.0211119)
Supplement: S5 Table — Characteristics of the HCPC model built on the PCA. Variables and species loadings on PCs 1, 2, 3 and 4 show which variables contribute the most (absolute value) to distinguish between species as represented by “General distinction” regression coefficient and related relevant significantly distinguished species. For each PC, the more two species have a high loading difference (relative value) the more they are distinguished by this PC. For the HCPC model, the main variables (or compounds) explaining the hierarchical cluster tree building have the highest absolute v.test/Etat2 values. The species fingerprints gathered within the main clusters are identified and the percentage of the species samples are given (%). The main variables responsible for the distinction between main clusters are given by the highest v.test values. (XLSX) [file pone.0211119.s007.xlsx]

## Sheet: Table S5 Saian PCA
Principal component		PC1		PC2		PC3		PC4			R code for PCA and weighted HCPC
Explained variance (%)		30.431		23.412		14.791		10.212
Cumulative explained variance (%)		30.431		53.842		68.633		78.846			##PCA/HCPC AVG all compounds
		p-value*	Load.†	p-value	Load.	p-value	Load.	p-value	Load.		avg.PCA<-avg[, c("Coprostanol", "Epicoprostanol",
Active quantitative variables	Coprostanol	1.22697e-15	-0.895393	n.s.	n.s.	n.s.	n.s.	n.s.	n.s.		"Brassicastanol", "Lichestanol", "Epibrassicastanol", "Campestanol", "Epicampestanol", "Stigmastanol", "Epistigmastanol", "X24Ethylcoprostanol", "X24Ethylepicoprostanol", "Species")]
	Epicoprostanol	n.s.	n.s.	n.s.	n.s.	6.45719e-09	0.757294	0.00402043	-0.434678
	5β-Brassicastanol	n.s.	n.s.	6.23209e-09	0.757784	0.0444263	-0.311787	n.s.	n.s.		d=avg[1:49,13]
	5β-Lichestanol	2.17956e-06	0.658056	n.s.	n.s.	0.00018362	-0.546047	n.s.	n.s.
	5β-Epibrassicastanol	n.s.	n.s.	3.5201e-06	0.647838	n.s.	n.s.	3.95674e-05	0.589754		res<-PCA(avg.PCA , scale.unit=TRUE, ncp=7, quali.sup=c(12: 12), graph = FALSE,row.w=d)
	5β-Campestanol	0.000201692	-0.543164	n.s.	n.s.	n.s.	n.s.	9.27967e-05	0.566245
	5β-Epicampestanol	3.14018e-06	0.650307	n.s.	n.s.	7.55884e-05	0.572068	n.s.	n.s.		res.hcpc<-HCPC(res ,nb.clust=-1,consol=FALSE,min=3,max=10,graph=TRUE)
	5β-Stigmastanol	0.00103162	0.488436	0.00034494	0.526169	n.s.	n.s.	n.s.	n.s.
	5β-Epistigmastanol	n.s.	n.s.	2.25154e-11	0.823016	n.s.	n.s.	n.s.	n.s.		plot.PCA(res, axes=c(1, 2), choix="ind", habillage="none", col.ind="black",
	24-Ethylcoprostanol	0.00148549	0.474853	1.39283e-07	-0.71005	n.s.	n.s.	n.s.	n.s.		col.ind.sup="blue", col.quali="magenta", label=c("ind", "ind.sup", "quali"),
	24-Ethylepicoprostanol	3.14601e-14	0.875817	n.s.	n.s.	0.0339143	0.328073	n.s.	n.s.		new.plot=TRUE)
		n.s.	n.s.	n.s.	n.s.	n.s.	n.s.	n.s.	n.s.
Species distinction	General distinction	5.61213e-19	0,91§	0.00183048	0.32955	2.96543e-06	0.531678	n.s.	n.s.		plot.PCA(res, axes=c(1, 2), choix="var", new.plot=TRUE, col.var="black",
	Dog	9.13332e-07	-1.71635	n.s.	n.s.	n.s.	n.s.	n.s.	n.s.		col.quanti.sup="blue", label=c("var", "quanti.sup"), lim.cos2.var=0)
	Horse	n.s.	n.s.	n.s.	n.s.	7.24494e-07	1.8459	n.s.	n.s.		summary(res, nb.dec = 3, nbelements=10, nbind = 10, ncp = 3, file="")
	Human	0.000135868	3.16227	0.000494122	-1.79867	n.s.	n.s.	n.s.	n.s.
	Reindeer	4.48227e-06	-4.59914	n.s.	n.s.	0.000103586	-1.17565	n.s.	n.s.		dimdesc(res,axe=1:4)
											res.hcpc$desc.var
* Significant threshold a = 0.05. No value means p > 0.05											res.hcpc$desc.axes
† Loading on the principal component											remove(avg.PCA)
‡ Non-significant at 0.05 level											remove(res.hcpc)
§ Regression coefficient
HCPC cluster building		General		Cluster 1		Cluster 2		Cluster 3		Cluster 4		Cluster 5
	Species (% individuals)			Dog (75)		Human (100)		Reindeer (52,17)		Horse (85,71), Reindeer (4,35)		Reindeer (43,48)
		p-value	v.test/Eta2	p-value	v.test	p-value	v.test	p-value	v.test	p-value	v.test	p-value	v.test
Active quantitative variables	Coprostanol	1.96676e-22	0.91021	0.00848383	2.63218	3.9106e-07	5.07326	0.0105065	-2.5587	n.s.	n.s.	0.0289548	-2.1841
	Epicoprostanol	8.10747e-09	0.620485	n.s.	n.s.	n.s.	n.s.	0.000316888	-3.60109	0.000119645	3.84685	n.s.	n.s.
	5β-Brassicastanol	7.51054e-08	0.578839	0.00420207	-2.86258	n.s.	n.s.	n.s.	n.s.	n.s.	n.s.	0.00076932	3.3636
	5β-Lichestanol	4.79253e-15	0.804427	0.0118081	-2.51783	0.00101263	-3.28699	n.s.	n.s.	n.s.	n.s.	2.10843e-05	4.25309
	5β-Epibrassicastanol	0.00219749	0.310472	0.0345705	-2.11335	0.0224488	2.28269	n.s.	n.s.	n.s.	n.s.	n.s.	n.s.
	5β-Campestanol	0.00226697	0.3094	0.00613673	2.74038	n.s.	n.s.	n.s.	n.s.	n.s.	n.s.	0.0289949	-2.18356
	5β-Epicampestanol	1.9886e-07	0.559138	0.000906116	-3.31816	n.s.	n.s.	n.s.	n.s.	0.000281515	3.63174	n.s.	n.s.
	5β-Stigmastanol	9.6497e-05	0.408363	0.000297494	-3.61747	n.s.	n.s.	n.s.	n.s.	n.s.	n.s.	0.0180553	2.36448
	5β-Epistigmastanol	0.000101748	0.406847	0.00404472	-2.87465	n.s.	n.s.	0.0266652	-2.21638	n.s.	n.s.	0.0399242	2.05453
	24-Ethylcoprostanol	2.38868e-10	0.67788	n.s.	n.s.	0.000237671	-3.67519	5.48098e-06	4.54548	n.s.	n.s.	n.s.	n.s.
	24-Ethylepicoprostanol	1.27614e-20	0.891359	0.0021051	-3.07499	4.50344e-05	-4.08001	n.s.	n.s.	8.76128e-05	3.92256	n.s.	n.s.
