# Supplementary material for: Faecal biomarkers can distinguish specific mammalian species in modern and past environments
Source: PLoS One. 2019 Feb 7;14(2):e0211119. doi: 10.1371/journal.pone.0211119 (PMC6366745; doi:10.1371/journal.pone.0211119)
Supplement: S6 Table — Characteristics of the HCPC model built on the PCA.Variables and species loadings on PCs 1, 2, 3 and 4 show which variables contribute the most (absolute value) to distinguish between species as represented by “General distinction” regression coefficient and related relevant significantly distinguished species. For each PC, the more two species have a high loading difference (relative value) the more they are distinguished by this PC. For the HCPC model, the main variables (or compounds) explaining the hierarchical cluster tree building have the highest absolute v.test/Etat2 values. The species fingerprints gathered within the main clusters are identified and the percentage of the species samples are given (%). The main variables responsible for the distinction between main clusters are given by the highest v.test values. (XLSX) [file pone.0211119.s008.xlsx]

## Sheet: Table S6 Iamal PCA
Principal component		PC1		PC2		PC3		PC4			R code for PCA and weighted HCPC
Explained variance (%)		28.536		24.751		14.252		10.542
Cumulative explained variance (%)		28.536		53.287		67.539		78.081			##PCA/HCPC Iarte all compounds
		p-value*	Load.†	p-value	Load.	p-value	Load.	p-value	Load.		iarte.PCA<-iarte[, c("Coprostanol", "Epicoprostanol", "Brassicastanol",
Active quantitative variables	Coprostanol	n.s. ‡	n.s.	1.48e-15	0.9	n.s.	n.s.	n.s.	n.s.		"Lichestanol", "Epibrassicastanol", "Campestanol", "Epicampestanol",
	Epicoprostanol	0.00506	0.43	0.0188	0.37	n.s.	n.s.	1.615e-05	-0.618796		"Stigmastanol", "Epistigmastanol", "X24Ethylcoprostanol",
	5β-Brassicastanol	0.000732	0.51	n.s.	n.s.	2.26e-08	0.75	n.s.	n.s.		"X24Ethylepicoprostanol", "Species")]
	5β-Lichestanol	2.97e-07	0.7	0.00648	-0.42	n.s.	n.s.	n.s.	n.s.		d=iarte[1:49,13]
	5β-Epibrassicastanol	1.13e-06	0.68	0.00772	0.41	n.s.	n.s.	0.015828	0.374576		res<-PCA(iarte.PCA , scale.unit=TRUE, ncp=7, quali.sup=c(12: 12), graph =
	5β-Campestanol	n.s.	n.s.	0.000338	0.53	n.s.	n.s.	0.00618652	0.42054		FALSE,row.w=d)
	5β-Epicampestanol	0.00117	0.49	n.s.	n.s.	n.s.	n.s.	0.000212496	0.547371		plot.PCA(res, axes=c(1, 2), choix="ind", habillage="none", col.ind="black",
	5β-Stigmastanol	n.s.	n.s.	0.0373	-0.33	2.56e-13	0.87	n.s.	n.s.		col.ind.sup="blue", col.quali="magenta", label=c("ind", "ind.sup", "quali"),
	5β-Epistigmastanol	2.03e-10	0.81	0.0262	0.35	n.s.	n.s.	n.s.	n.s.		new.plot=TRUE)
	24-Ethylcoprostanol	0.000303	-0.54	4.9e-09	-0.77	n.s.	n.s.	n.s.	n.s.		plot.PCA(res, axes=c(1, 2), choix="var", new.plot=TRUE, col.var="black",
	24-Ethylepicoprostanol	9.88e-07	0.68	0.000271	-0.54	0.025	-0.35	n.s.	n.s.		col.quanti.sup="blue", label=c("var", "quanti.sup"), lim.cos2.var=0)
		n.s.	n.s.	n.s.	n.s.	n.s.	n.s.	n.s.	n.s.		summary(res, nb.dec = 3, nbelements=10, nbind = 10, ncp = 3, file="")
Species Distinction	General distinction	3.19671e-07	0,60§	1.95681e-15	0.859943	0.00013362	0.430002	n.s.	n.s.		res.hcpc<-HCPC(res ,nb.clust=-1,consol=FALSE,min=3,max=10,graph=TRUE)
	Dog	0.0163878	0.511691	0.000786196	3.91145	0.0215145	-2.81799	n.s.	n.s.		dimdesc(res,axe=1:4)
	Human	n.s.	n.s.	1.02719e-06	3.66108	n.s.	n.s.	n.s.	n.s.		res.hcpc$desc.var
	Lemming	5.10248e-05	3.50695	0.0261579	0.512579	0.0014587	-1.8434	n.s.	n.s.		res.hcpc$desc.axes
	Reindeer	1.03641e-05	0.511691	3.83521e-05	3.91145	0.02433	-2.81799	n.s.	n.s.		remove(iarte.PCA)
											remove(res.hcpc)
* Significant threshold a = 0.05. No value means p > 0.05
† Loading on the principal component
‡ Non-significant at 0.05 level
§ Regression coefficient
HCPC cluster building		General		Cluster 1		Cluster 2		Cluster 3
	Species (% individuals)			Lemming (100)		Human (100), Dog (100)		Reindeer (100)
		p-value	v.test/Eta2	p-value	v.test	p-value	v.test	p-value	v.test
Active quantitative variables	Coprostanol	1.28333e-24	0.90854	n.s.	n.s.	1.65896e-09	6.0281	1.41039e-05	-4.34224
	Epicoprostanol	0.0143707	0.168446	0.0100214	-2.57509	n.s.	n.s.	n.s.	n.s.
	5β-Brassicastanol	n.s.	n.s.	n.s.	n.s.	n.s.	n.s.	n.s.	n.s.
	5β-Lichestanol	5.16062e-15	0.760771	0.00208025	-3.07853	0.000327859	-3.59223	4.11053e-08	5.48604
	5β-Epibrassicastanol	0.00923178	0.184293	0.0100214	-2.67125	n.s.	n.s.	n.s.	n.s.
	5β-Campestanol	0.00210481	0.235077	n.s.	n.s.	0.0026042	3.01096	0.00965316	-2.58801
	5β-Epicampestanol	0.0205034	0.155497	n.s.	n.s.	n.s.	n.s.	0.0134311	2.47213
	5β-Stigmastanol	0.000328469	0.294425	0.00188195	3.10826	0.0257563	-2.22987	n.s.	n.s.
	5β-Epistigmastanol	0.00144175	0.247557	0.00165081	-3.14678	n.s.	n.s.	n.s.	n.s.
	24-Ethylcoprostanol	5.68765e-11	0.64144	2.22474e-05	4.24105	0.000145176	-3.79918	n.s.	n.s.
	24-Ethylepicoprostanol	1.40594e-16	0.795459	0.00667414	-2.71268	5.24245e-05	0.0815887	1.69881e-08	5.64017
	Coprostanol 0.9085398 1.283335e-24
	X24Ethylepicoprostanol 0.7954586 1.405939e-16
	Lichestanol 0.7607714 5.160617e-15
	X24Ethylcoprostanol 0.6414396 5.687645e-11
	Stigmastanol 0.2944249 3.284691e-04
	Epistigmastanol 0.2475573 1.441747e-03
	Campestanol 0.2350766 2.104811e-03
	Epibrassicastanol 0.1842931 9.231785e-03
	Epicoprostanol 0.1684463 1.437068e-02
	Epicampestanol 0.1554971 2.050344e-02
