# Supplementary material for: Faecal biomarkers can distinguish specific mammalian species in modern and past environments
Source: PLoS One. 2019 Feb 7;14(2):e0211119. doi: 10.1371/journal.pone.0211119 (PMC6366745; doi:10.1371/journal.pone.0211119)
Supplement: S7 Table — (XLSX) [file pone.0211119.s009.xlsx]

## Sheet: Table S7 Soil fingerprints
Name	R1	R2	R3	R4	PCA-4	PCA-11
Ratio or Statistical analysis	coprostanol / (coprostanol + 24-ethylcoprostanol)	(coprostanol + epicoprostanol) / (24-ethylcoprostanol + 24-ethylepicoprostanol)	epicoprostanol / (cholestanol + coprostanol)	(24-ethylepicoprostanol / 24-ethylcoprostanol) + (epicoprostanol / coprostanol)	PCA/HCPC - 4 main 5β-stanols	PCA/HCPC - 11 5β-stanols
Diagnostic	Diet group identification	Omnivore identification	Diet group identification	Horse identification	?	Species identification
Values
Iamal1 - Control	0	0	0	NA
Iamal2	0.24311	0.279577	0.108948	0.91654
Iamal3	0.837845	3.38893	0.1629	1.05589
Iamal4	0.922594	10.5343	0.261244	0.728372
Iamal5	0.355641	0.488477	0.223398	0.836655
Iamal6	0.446746	0.79631	0.291092	0.72633
Iamal7	0.333447	0.389687	0.102104	0.649652
Iamal8	0.43855	0.6765	0.20701	0.722486
Iamal9	0.543281	0.990707	0.163259	0.752975
Saian1 - Control	NA	NA	NA	NA
Saian2	0.331499	0.654828	0.366813	1.23625
Saian3	0.308056	0.587425	0.230922	0.795187
Saian4	0.321134	0.456228	0.174008	1.03734
Saian5	0.344008	0.50446	0.115276	0.937993
Saian6	0.185234	0.306047	0.276793	1.12551
Saian7	0.273496	0.475382	0.246737	0.972151
Saian8	0.411093	0.681069	0.154691	1.93305
Diagnostic with Literature thresholds	Leeming et al., 1997 [20]	Shillito et al., 2011 [7]	Standley et al., 2000 [21]	Prost et al., 2017 [10]	This study	This study	Diagnostic matching
	Herbivore = 0.38 < R < 0.73 = Human	Omnivore > 1	Human = 0.01 < R < 0.1 = Cattle and Horse	No Horse = 0.8 < R < 1.2 = Horse
Iamal1 - Control	NA	NA		NA	NA	NA
Iamal2	Herbivore	Herbivore	Cattle or Horse	NA	Reindeer winter	Reindeer winter	Yes
Iamal3	Human	Omnivore	Cattle or Horse	NA	Omnivore	Reindeer winter	No
Iamal4	Human	Omnivore	Cattle or Horse	NA	Omnivore	Dog	No
Iamal5	Omnivore	Herbivore	Cattle or Horse	NA	Reindeer winter	Reindeer winter	No
Iamal6	Omnivore	Herbivore	Cattle or Horse	NA	Reindeer winter	Reindeer winter	No
Iamal7	Omnivore	Herbivore	Cattle or Horse	NA	Reindeer summer	Reindeer winter	No
Iamal8	Omnivore	Herbivore	Cattle or Horse	NA	Reindeer winter	Reindeer winter	No
Iamal9	Omnivore	Herbivore	Cattle or Horse	NA	Reindeer winter	Reindeer winter	No
Saian1 - Control	NA	NA	NA	NA	NA	NA
Saian2	Herbivore	Herbivore	Cattle or Horse	Horse	Horse/Winter reindeer	Horse	Yes
Saian3	Herbivore	Herbivore	Cattle or Horse	No Horse	Horse/Winter reindeer	Reindeer winter	No
Saian4	Herbivore	Herbivore	Cattle or Horse	No Horse	Horse/Winter reindeer	Reindeer winter	Yes
Saian5	Herbivore	Herbivore	Cattle or Horse	No Horse	Horse/Winter reindeer	Reindeer winter	Yes
Saian6	Herbivore	Herbivore	Cattle or Horse	No Horse	Horse/Winter reindeer	Reindeer winter	No
Saian7	Herbivore	Herbivore	Cattle or Horse	No Horse	Horse/Winter reindeer	Reindeer winter	No
Saian8	Omnivore	Herbivore	Cattle or Horse	Horse	Horse/Winter reindeer	Reindeer winter	No
Database threshold*	Overlapping = not applicable	Herbivore= 0.7 < R < 0.9 = Omnivore	Human = 0.05 < R < 0.28 = Cattle and Horse	Overlapping = not applicable
Iamal1 - Control	NA	NA	NA	NA	NA	NA
Iamal2	NA	Herbivore	Unknown	NA	Reindeer winter	Reindeer winter	Yes
Iamal3	NA	Omnivore	Unknown	NA	Omnivore	Reindeer winter	No
Iamal4	NA	Omnivore	Unknown	NA	Omnivore	Omnivore	Yes
Iamal5	NA	Herbivore	Unknown	NA	Reindeer winter	Reindeer winter	Yes
Iamal6	NA	Unknown	Cattle or Horse	NA	Reindeer summer	Reindeer winter	No
Iamal7	NA	Herbivore	Unknown	NA	Reindeer summer	Reindeer winter	No
Iamal8	NA	Herbivore	Unknown	NA	Reindeer winter	Reindeer winter	Yes
Iamal9	NA	Omnivore	Unknown	NA	Reindeer summer	Reindeer winter	No
Saian1 - Control	NA	NA	NA	NA	NA	NA
Saian2	NA	Herbivore	Cattle or Horse	NA	Horse	Horse	Yes
Saian3	NA	Herbivore	Unknown	NA	Reindeer winter	Reindeer winter	Yes
Saian4	NA	Herbivore	Unknown	NA	Reindeer winter	Reindeer winter	Yes
Saian5	NA	Herbivore	Unknown	NA	Reindeer winter	Reindeer winter	Yes
Saian6	NA	Herbivore	Unknown	NA	Reindeer winter	Reindeer winter	Yes
Saian7	NA	Herbivore	Unknown	NA	Reindeer winter	Reindeer winter	Yes
Saian8	NA	Herbivore	Unknown	NA	Horse	Reindeer winter	No
