# Supplementary material for: Faecal biomarkers can distinguish specific mammalian species in modern and past environments
Source: PLoS One. 2019 Feb 7;14(2):e0211119. doi: 10.1371/journal.pone.0211119 (PMC6366745; doi:10.1371/journal.pone.0211119)
Supplement: S8 Table — Characteristics of the HCPC model built on the PCA. Variables and species loadings on PCs 1, 2, 3 and 4 show which variables contribute the most (absolute value) to distinguish between species as represented by “General distinction” regression coefficient and related relevant significantly distinguished species. For each PC, the more two species have a high loading difference (relative value) the more they are distinguished by this PC. For the HCPC model, the main variables (or compounds) explaining the hierarchical cluster tree building have the highest absolute v.test/Etat2 values. The species fingerprints gathered within the main clusters are identified and the percentage of the species samples are given (%). The main variables responsible for the distinction between main clusters are given by the highest v.test values. (XLSX) [file pone.0211119.s010.xlsx]

## Sheet: Table S8 Saian PCA 4 comps
Principal component		PC1		PC2		PC3		PC4			R code for PCA and weighted HCPC
Explained variance (%)		62.071		31.573		6.137		0.219													NEW code
Cumulative explained variance (%)		62.071		93.644		99.781		100			##PCA/HCPC AVG all compounds
																					avg.PCA<-avg[, c("Coprostanol", "Epicoprostanol",
		p-value*	Load.†	p-value	Load.	p-value	Load.	p-value	Load.		ALLSAMPLES.PCA<-avg[, c("Coprostanol", "Epicoprostanol",										"Brassicastanol", "Lichestanol", "Epibrassicastanol", "Campestanol", "Epicampestanol", "Stigmastanol", "Epistigmastanol", "X24Ethylcoprostanol", "X24Ethylepicoprostanol", "Species")]
Active quantitative variables	Coprostanol	2.12289e-40	-0.994225	n.s.	n.s.	n.s.	n.s.	n.s.	n.s.		"Brassicastanol", "Lichestanol", "Campestanol", "Epicampestanol", "Epistigmastanol",
	Epicoprostanol	n.s.	n.s.	3.21327e-18	0.923309	n.s.	n.s.	n.s.	n.s.		"X24Ethylcoprostanol", "X24Ethylepicoprostanol", "Species")]										d=avg[1:49,13]
	24-Ethylcoprostanol	9.36674e-10	0.782404	9.06938e-05	-0.566901	n.s.	n.s.	n.s.	n.s.
	24-Ethylepicoprostanol	1.00221e-15	0.896501	n.s.	n.s.	0.0307401	-0.333807	n.s.	n.s.		d=avg[1:49,11]										res<-PCA(avg.PCA , scale.unit=TRUE, ncp=7, quali.sup=c(12: 12), graph = FALSE,row.w=d)
Species distinction	General distinction	1.02374e-22	0,94§	n.s.	n.s.	0.0427544	0.195692	n.s.	n.s.		res<-PCA(ALLSAMPLES.PCA , scale.unit=TRUE, ncp=7, quali.sup=c(10: 10), graph = FALSE,row.w=d)										res.hcpc<-HCPC(res ,nb.clust=-1,consol=FALSE,min=3,max=10,graph=TRUE)
	Dog	0.00336367	0.384492	n.s.	n.s.	0.00702247	0.851406	n.s.	n.s.
	Horse	0.0254756	3.74609	0.0065775	1.09416	n.s.	n.s.	n.s.	n.s.		res.hcpc<-HCPC(res ,nb.clust=-1,consol=FALSE,min=3,max=10,graph=TRUE)										plot.PCA(res, axes=c(1, 2), choix="ind", habillage="none", col.ind="black",
	Human	1.18133e-09	3.41719	n.s.	n.s.	n.s.	n.s.	n.s.	n.s.												col.ind.sup="blue", col.quali="magenta", label=c("ind", "ind.sup", "quali"),
	Reindeer	1.30214e-05	-7.54777	0.04488	-1.0145	n.s.	n.s.	n.s.	n.s.		plot.PCA(res, axes=c(1, 2), choix="ind", habillage="none", col.ind="black",										new.plot=TRUE)
											col.ind.sup="blue", col.quali="magenta", label=c("ind", "ind.sup", "quali"),
* Significant threshold a = 0.05. No value means p > 0.05											new.plot=TRUE)										plot.PCA(res, axes=c(1, 2), choix="var", new.plot=TRUE, col.var="black",
† Loading on the principal component																					col.quanti.sup="blue", label=c("var", "quanti.sup"), lim.cos2.var=0)
‡ Non-significant at 0.05 level											plot.PCA(res, axes=c(1, 2), choix="var", new.plot=TRUE, col.var="black",										summary(res, nb.dec = 3, nbelements=10, nbind = 10, ncp = 3, file="")
§ Regression coefficient											col.quanti.sup="blue", label=c("var", "quanti.sup"), lim.cos2.var=0)
											summary(res, nb.dec = 3, nbelements=10, nbind = 10, ncp = 3, file="")										dimdesc(res,axe=1:4)
																					res.hcpc$desc.var
HCPC cluster building		General		Cluster 1		Cluster 2		Cluster 3			dimdesc(res,axe=1:3)										res.hcpc$desc.axes
	Species (% individuals)			Human (100), Dog (100)		Reindeer (65,22)		Horse (85,71)			remove(ALLSAMPLES.PCA)										remove(avg.PCA)
																					remove(res.hcpc)
		p-value	v.test/Eta2	p-value	v.test	p-value	v.test	p-value	v.test
Active quantitative variables	Coprostanol	1.04671e-24	0.909347	1.03338e-09	6.10417	0.00158686	-3.15831	0.00942729	-2.59616
	Epicoprostanol	3.30437e-12	0.683167	n.s.	n.s.	0.000332329	-3.5887	1.72078e-07	5.22722
	24-Ethylcoprostanol	1.6413e-12	0.692662	2.15461e-06	-4.73835	7.88648e-06	4.46824	n.s.	n.s.
	24-Ethylepicoprostanol	7.34263e-19	0.837236	1.14211e-08	-5.70815	n.s.	n.s.	0.000188578	3.73385
