# Supplementary material for: Faecal biomarkers can distinguish specific mammalian species in modern and past environments
Source: PLoS One. 2019 Feb 7;14(2):e0211119. doi: 10.1371/journal.pone.0211119 (PMC6366745; doi:10.1371/journal.pone.0211119)
Supplement: S9 Table — Characteristics of the HCPC model built on the PCA. Variables and species loadings on PCs 1, 2, 3 and 4 show which variables contribute the most (absolute value) to distinguish between species as represented by “General distinction” regression coefficient and related relevant significantly distinguished species. For each PC, the more two species have a high loading difference (relative value) the more they are distinguished by this PC. For the HCPC model, the main variables (or compounds) explaining the hierarchical cluster tree building have the highest absolute v.test/Etat2 values. The species fingerprints gathered within the main clusters are identified and the percentage of the species samples are given (%). The main variables responsible for the distinction between main clusters are given by the highest v.test values. (XLSX) [file pone.0211119.s011.xlsx]

## Sheet: Table S9 Iamal PCA 4 comps
Principal component		PC1		PC2		PC3		PC4			R code for PCA and weighted HCPC
Explained variance (%)		52.526		37.959		9.305		0.211
Cumulative explained variance (%)		52.526		90.485		99.789		100			##PCA/HCPC Iarte 4 compounds
		p-value*	Load.†	p-value	Load.	p-value	Load.	p-value	Load.		iarte4.PCA<-iarte4[, c("Coprostanol", "Epicoprostanol", "X24Ethylcoprostanol",
Active quantitative variables	Coprostanol	7.27341e-27	-0.974321	n.s.	n.s.	n.s.	n.s.	n.s.	n.s.		"X24Ethylepicoprostanol", "Species")]
	Epicoprostanol	0.0499906	-0.308143	9.53922e-13	0.856241	0.00705087	0.414503	n.s.	n.s.		d=iarte4[1:49,6]
	24-Ethylcoprostanol	8.41362e-17	0.913322	0.0347763	-0.330567	n.s.	n.s.	n.s.	n.s.		res<-PCA(iarte4.PCA , scale.unit=TRUE, ncp=7, quali.sup=c(5: 5), graph =
	24-Ethylepicoprostanol	0.00184363	0.471832	3.80771e-10	0.799001	0.0167393	-0.37163	n.s.	n.s.		FALSE,row.w=d)
		n.s.	n.s.	n.s.	n.s.	n.s.	n.s.	n.s.	n.s.		plot.PCA(res, axes=c(1, 2), choix="ind", habillage="none", col.ind="black",
Species Distinction	General distinction	5.26822e-15	0,85§	2.33703e-06	0.547488	0.00303583	0.316968	n.s.	n.s.		col.ind.sup="blue", col.quali="magenta", label=c("ind", "ind.sup", "quali"),
	Dog	0.00503474	-3.23257	n.s.	n.s.	n.s.	n.s.	n.s.	n.s.		new.plot=TRUE)
	Human	8.96198e-08	-3.46822	n.s.	n.s.	n.s.	n.s.	n.s.	n.s.		plot.PCA(res, axes=c(1, 2), choix="var", new.plot=TRUE, col.var="black",
	Lemming	0.0136922	-0.615967	9.1004e-05	2.44696	0.00401114	-0.79475	n.s.	n.s.		col.quanti.sup="blue", label=c("var", "quanti.sup"), lim.cos2.var=0)
	Reindeer	0.000127993	-3.23257	9.57087e-07	1.23925	n.s.	n.s.	n.s.	n.s.		summary(res, nb.dec = 3, nbelements=10, nbind = 10, ncp = 3, file="")
											res.hcpc<-HCPC(res ,nb.clust=-1,consol=FALSE,min=3,max=10,graph=TRUE)
* Significant threshold a = 0.05. No value means p > 0.05											dimdesc(res,axe=1:4)
† Loading on the principal component											res.hcpc$desc.var
‡ Non-significant at 0.05 level											res.hcpc$desc.axes
§ Regression coefficient											remove(iarte4.PCA)
											remove(res.hcpc)
HCPC cluster building		General		Cluster 1		Cluster 2		Cluster 3
	Species (% individuals)			Human (100), Dog (100)		Reindeer (52,17)		Lemming (100)
		p-value	v.test/Eta2	p-value	v.test	p-value	v.test	p-value	v.test
Active quantitative variables	Coprostanol	3.1637e-25	0.913942	1.81334e-09	6.0137	n.s.	n.s.	0.000155022	-3.78288
	Epicoprostanol	2.83496e-09	0.575017	n.s.	n.s.	1.37814e-05	4.34732	4.98467e-05	-4.05635
	24-Ethylcoprostanol	2.3778e-15	0.768697	2.6712e-06	-4.69461	n.s.	n.s.	5.09367e-07	5.02275
	24-Ethylepicoprostanol	1.70846e-10	0.623876	3.92071e-05	-4.1121	1.83715e-05	4.28382	n.s.	n.s.
